# Supplementary material for: Development and validation of a survival model for thyroid carcinoma based on autophagy-associated genes
Source: Aging (Albany NY). 2020 Oct 14;12(19):19129–46. doi: 10.18632/aging.103715 (PMC7732287; doi:10.18632/aging.103715)
Supplement: Supplementary Table 1 [file aging-12-103715-s001..xlsx]

## Sheet: aging-12-103715-s001
Supplementary Table 1. Clinicopathological parameters of all patients in THCA.
Id	futime	fustat	age	gender	grade	stage	T	M	N
TCGA-FY-A3NN	0	0	48	FEMALE	unknow	Stage III	T1b	MX	N1a
TCGA-J8-A4HY	6	0	68	FEMALE	unknow	Stage IVA	T4a	MX	N1b
TCGA-ET-A3DS	9	0	33	FEMALE	unknow	Stage I	T1	MX	N0
TCGA-FK-A3SG	28	0	21	FEMALE	unknow	Stage I	T2	MX	N1b
TCGA-FK-A3SD	32	0	61	FEMALE	unknow	Stage I	T1	M0	N0
TCGA-FY-A2QD	38	0	61	FEMALE	unknow	unknow	T1	unknow	N0
TCGA-EL-A3GP	43	0	70	MALE	unknow	Stage III	T3	M0	N1a
TCGA-FY-A76V	51	0	54	MALE	unknow	Stage II	T2	MX	NX
TCGA-DO-A2HM	71	0	49	MALE	unknow	Stage IVA	T1b	MX	N1b
TCGA-ET-A3BW	72	0	30	FEMALE	unknow	Stage I	T2	MX	NX
TCGA-J8-A42S	75	0	45	MALE	unknow	Stage III	T1b	MX	N1a
TCGA-J8-A4HW	79	0	59	FEMALE	unknow	Stage III	T2	M0	N1
TCGA-ET-A2N4	81	0	53	FEMALE	unknow	Stage III	T3	MX	N0
TCGA-DE-A7U5	84	0	36	FEMALE	unknow	Stage I	T2	M0	N0
TCGA-EM-A2CP	91	0	26	FEMALE	unknow	Stage I	T2	MX	N0
TCGA-E8-A418	92	0	75	FEMALE	unknow	Stage IVA	T4a	M0	N0
TCGA-DJ-A4V2	95	0	38	FEMALE	unknow	Stage I	T2	M0	N0
TCGA-DJ-A3VI	95	0	52	FEMALE	unknow	Stage III	T1b	M0	N1a
TCGA-BJ-A45F	105	0	59	FEMALE	unknow	Stage I	T1b	M0	N0
TCGA-BJ-A0ZB	122	0	66	MALE	unknow	Stage IVA	T3	M0	N1b
TCGA-FK-A3SB	125	0	28	FEMALE	unknow	Stage I	T3	MX	N1a
TCGA-EL-A3CY	127	0	28	MALE	unknow	Stage I	TX	M0	N1b
TCGA-4C-A93U	129	0	74	FEMALE	unknow	Stage IVA	T4a	M0	N1b
TCGA-BJ-A191	147	0	49	FEMALE	unknow	Stage I	T1b	M0	N0
TCGA-EM-A4FM	162	0	59	FEMALE	unknow	Stage IVA	T3	MX	N1b
TCGA-J8-A3YH	175	0	39	MALE	unknow	Stage I	T3	M0	N1b
TCGA-ET-A3BS	176	0	42	MALE	unknow	Stage I	T3	MX	N1a
TCGA-DJ-A1QM	183	0	42	MALE	unknow	Stage I	T1a	M0	N0
TCGA-EM-A2CO	184	0	77	FEMALE	unknow	Stage II	T2	MX	NX
TCGA-IM-A3U2	190	0	89	FEMALE	unknow	Stage IVA	T3	MX	N1b
TCGA-GE-A2C6	206	0	33	FEMALE	unknow	Stage I	T2	MX	N1b
TCGA-EL-A3ZS	215	0	22	FEMALE	unknow	Stage I	T1a	M0	N1
TCGA-EM-A3O7	223	0	46	FEMALE	unknow	Stage III	T3	MX	NX
TCGA-ET-A3BX	229	0	24	MALE	unknow	Stage I	T3	MX	N1a
TCGA-EM-A3OB	238	0	33	FEMALE	unknow	Stage I	T2	MX	N0
TCGA-FY-A3I5	238	0	64	FEMALE	unknow	Stage III	T3	MX	N0
TCGA-DJ-A2PO	243	0	54	MALE	unknow	Stage I	T1a	M0	N0
TCGA-IM-A420	250	0	39	FEMALE	unknow	Stage I	T2	MX	N1a
TCGA-DJ-A13X	253	0	51	FEMALE	unknow	Stage III	T3	M0	N0
TCGA-EM-A3AP	254	0	31	FEMALE	unknow	Stage I	T2	MX	NX
TCGA-DJ-A2PZ	256	0	63	MALE	unknow	Stage III	T3	M0	N0
TCGA-DJ-A13S	265	0	19	FEMALE	unknow	Stage I	T1b	M0	N0
TCGA-DJ-A2PY	267	0	46	FEMALE	unknow	Stage III	T3	M0	N1a
TCGA-EM-A3O9	281	0	40	MALE	unknow	Stage I	T3	MX	N0
TCGA-L6-A4EU	289	0	58	FEMALE	unknow	Stage III	T3	M0	N1a
TCGA-DJ-A3VF	292	0	60	FEMALE	unknow	Stage IVA	T3	M0	N1b
TCGA-DJ-A13L	303	0	85	MALE	unknow	Stage I	T1b	M0	N0
TCGA-DJ-A2PN	307	0	70	FEMALE	unknow	Stage I	T1b	M0	N0
TCGA-EM-A22L	318	0	33	FEMALE	unknow	Stage I	T2	MX	N0
TCGA-EM-A2CT	319	0	20	FEMALE	unknow	Stage I	T1b	MX	N0
TCGA-EM-A22N	324	0	68	FEMALE	unknow	Stage I	T1b	MX	N0
TCGA-CE-A482	325	0	27	FEMALE	unknow	Stage I	T1	M0	N1
TCGA-BJ-A45D	331	0	36	MALE	unknow	Stage I	T2	M0	N0
TCGA-H2-A3RI	335	0	29	FEMALE	unknow	Stage I	T3	MX	N0
TCGA-BJ-A28Z	337	0	46	FEMALE	unknow	Stage III	T3	M0	N1a
TCGA-J8-A3O2	342	0	39	MALE	unknow	Stage I	T3	M0	N1b
TCGA-BJ-A28W	344	0	32	FEMALE	unknow	Stage I	T2	M0	N0
TCGA-DJ-A3UX	345	0	46	FEMALE	unknow	Stage I	T1	M0	N0
TCGA-CE-A481	346	0	41	FEMALE	unknow	Stage I	T1	M0	N0
TCGA-H2-A421	349	0	34	FEMALE	unknow	Stage I	T1b	M0	N1a
TCGA-EM-A3ST	350	0	62	FEMALE	unknow	Stage III	T3	MX	N0
TCGA-DE-A4MB	352	0	79	FEMALE	unknow	Stage IVA	T3	M0	N1b
TCGA-BJ-A0ZC	352	0	55	MALE	unknow	Stage I	T1	M0	N0
TCGA-E8-A2JQ	356	0	18	FEMALE	unknow	Stage I	T3	M0	N1a
TCGA-EM-A2CM	357	0	62	FEMALE	unknow	Stage III	T3	MX	N0
TCGA-EM-A2OZ	367	0	66	MALE	unknow	Stage I	T1b	MX	N0
TCGA-E3-A3DZ	367	0	55	FEMALE	unknow	Stage III	T3	M0	N0
TCGA-EM-A3FN	367	0	42	FEMALE	unknow	Stage I	T3	MX	N0
TCGA-ET-A3DT	371	0	23	FEMALE	unknow	Stage I	T2	MX	N1a
TCGA-H2-A422	371	0	40	FEMALE	unknow	Stage I	T2	MX	N0
TCGA-ET-A2MZ	373	0	39	MALE	unknow	Stage I	T1b	MX	N0
TCGA-EM-A2CQ	374	0	40	FEMALE	unknow	Stage I	T1b	MX	N1a
TCGA-CE-A27D	374	0	28	FEMALE	unknow	Stage I	T2	M0	N1
TCGA-CE-A484	378	0	37	FEMALE	unknow	Stage I	T2	M0	N1
TCGA-CE-A3ME	379	0	51	FEMALE	unknow	Stage II	T2	M0	N0
TCGA-H2-A3RH	379	0	41	FEMALE	unknow	Stage I	T1b	M0	N0
TCGA-EM-A3O8	381	0	33	FEMALE	unknow	Stage I	T1b	MX	N0
TCGA-CE-A485	385	0	32	MALE	unknow	Stage I	T2	M0	N1
TCGA-CE-A13K	385	0	30	FEMALE	unknow	Stage I	T3	M0	N1
TCGA-CE-A3MD	389	0	31	MALE	unknow	Stage I	T2	M0	N1
TCGA-EM-A3SZ	389	0	42	FEMALE	unknow	Stage I	T2	MX	N0
TCGA-BJ-A2P4	390	0	29	FEMALE	unknow	Stage I	T2	M0	N0
TCGA-QD-A8IV	392	0	50	FEMALE	unknow	Stage IVA	T3	MX	N1b
TCGA-EM-A2CU	400	0	47	FEMALE	unknow	Stage III	T2	MX	N1a
TCGA-EM-A2CL	401	0	31	MALE	unknow	Stage I	T2	MX	NX
TCGA-EM-A3AO	407	0	61	MALE	unknow	Stage IVA	T2	MX	N1b
TCGA-EM-A3SY	411	0	36	MALE	unknow	Stage I	T1b	MX	NX
TCGA-E8-A44M	413	0	23	FEMALE	unknow	Stage I	T1b	M0	N0
TCGA-E8-A413	414	0	38	FEMALE	unknow	Stage I	T1b	M0	N0
TCGA-EM-A2CR	415	0	46	FEMALE	unknow	Stage II	T2	MX	N0
TCGA-EM-A4G1	416	0	26	FEMALE	unknow	Stage I	T1b	MX	N0
TCGA-E8-A44K	419	0	50	FEMALE	unknow	Stage I	T1b	M0	N0
TCGA-BJ-A0Z0	419	0	55	MALE	unknow	Stage II	T2	MX	N0
TCGA-E8-A415	420	0	39	FEMALE	unknow	Stage I	T1a	M0	N1b
TCGA-FY-A4B0	420	0	76	MALE	unknow	Stage I	T1a	MX	NX
TCGA-EM-A2OW	421	0	37	FEMALE	unknow	Stage I	T1b	MX	NX
TCGA-FY-A3R6	423	0	57	FEMALE	unknow	Stage IVA	T2	MX	N1b
TCGA-EM-A3OA	423	0	55	FEMALE	unknow	Stage II	T2	MX	N0
TCGA-BJ-A3F0	424	0	64	FEMALE	unknow	Stage I	T1b	M0	N0
TCGA-E3-A3E5	427	0	57	MALE	unknow	Stage IVA	T4a	MX	N1b
TCGA-FY-A4B3	427	0	51	MALE	unknow	Stage III	T3	MX	N1a
TCGA-E8-A416	428	0	51	FEMALE	unknow	Stage I	T1b	M0	N0
TCGA-E8-A434	429	0	56	FEMALE	unknow	Stage I	T1a	M0	N0
TCGA-EM-A3AL	430	0	45	FEMALE	unknow	Stage I	T1b	MX	N0
TCGA-DJ-A4UT	430	0	32	FEMALE	unknow	Stage I	T1a	M0	N0
TCGA-EM-A22Q	433	0	36	MALE	unknow	Stage I	T3	MX	N0
TCGA-DE-A69K	434	0	58	FEMALE	unknow	Stage III	T3	M0	N0
TCGA-E8-A417	434	0	38	FEMALE	unknow	Stage I	T2	M0	N1a
TCGA-E8-A414	434	0	45	FEMALE	unknow	Stage III	T3	M0	N0
TCGA-E8-A432	439	0	57	FEMALE	unknow	Stage II	T2	M0	N0
TCGA-EM-A3O3	441	0	83	FEMALE	unknow	Stage III	T2	MX	N1a
TCGA-EM-A22J	441	0	56	FEMALE	unknow	Stage II	T2	MX	N0
TCGA-EM-A22M	442	0	52	MALE	unknow	Stage I	T1b	MX	N0
TCGA-EM-A2P3	444	0	47	FEMALE	unknow	Stage I	T1b	MX	NX
TCGA-E8-A433	447	0	25	FEMALE	unknow	Stage I	T2	M0	N0
TCGA-DJ-A4UW	447	0	34	FEMALE	unknow	Stage I	T1a	M0	N1b
TCGA-DE-A69J	447	0	34	FEMALE	unknow	Stage I	T2	M0	NX
TCGA-BJ-A0Z5	448	0	58	MALE	unknow	Stage III	T3	M0	N1a
TCGA-EM-A22I	448	0	52	FEMALE	unknow	Stage III	T3	MX	N0
TCGA-ET-A25N	450	0	28	FEMALE	unknow	Stage I	T2	MX	N1a
TCGA-DJ-A1QI	455	0	63	FEMALE	unknow	Stage II	T2	M0	N0
TCGA-E8-A436	455	0	53	FEMALE	unknow	Stage IVA	T2	M0	N1b
TCGA-CE-A483	457	0	34	FEMALE	unknow	Stage I	T2	M0	N1
TCGA-EM-A3FR	457	0	55	FEMALE	unknow	Stage III	T2	MX	N1a
TCGA-EM-A3O6	458	0	54	FEMALE	unknow	Stage II	T2	MX	NX
TCGA-DJ-A3UK	459	0	35	FEMALE	unknow	Stage I	T1b	M0	N0
TCGA-BJ-A0ZH	460	0	52	FEMALE	unknow	Stage IVA	T2	MX	N1b
TCGA-FY-A40K	461	0	46	FEMALE	unknow	Stage I	T1a	MX	N0
TCGA-DJ-A4UR	469	0	36	FEMALE	unknow	Stage II	T3	M1	N1b
TCGA-BJ-A45I	470	0	51	FEMALE	unknow	Stage III	T3	M0	N0
TCGA-BJ-A3PR	471	0	69	FEMALE	unknow	Stage I	T1a	M0	N0
TCGA-EM-A3SX	475	0	28	FEMALE	unknow	Stage I	T3	MX	N1a
TCGA-KS-A41J	477	0	28	FEMALE	unknow	Stage I	T2	M0	N1
TCGA-FY-A3R8	477	0	62	FEMALE	unknow	Stage III	T3	MX	NX
TCGA-EM-A3AK	477	0	62	FEMALE	unknow	Stage I	T1b	MX	N0
TCGA-EM-A22K	479	0	46	FEMALE	unknow	Stage IVA	T1b	MX	N1b
TCGA-DJ-A4V4	481	0	48	FEMALE	unknow	Stage I	T1a	M0	N0
TCGA-DE-A3KN	482	0	49	FEMALE	unknow	Stage IVA	T3	M0	N1b
TCGA-KS-A41I	486	0	47	FEMALE	unknow	Stage I	T1	M0	N0
TCGA-BJ-A3EZ	487	0	51	MALE	unknow	Stage IVA	T3	M0	N1b
TCGA-ET-A2N0	489	0	51	FEMALE	unknow	Stage III	T1b	MX	N1a
TCGA-FY-A3NP	491	0	69	MALE	unknow	Stage I	T1	M0	N0
TCGA-EM-A2CS	491	0	51	FEMALE	unknow	Stage IVA	T3	MX	N1b
TCGA-EM-A3FQ	492	0	19	FEMALE	unknow	Stage I	T3	MX	N1b
TCGA-FY-A3R7	495	0	50	FEMALE	unknow	Stage III	T3	MX	N1a
TCGA-BJ-A0Z3	497	0	33	FEMALE	unknow	Stage I	T1	M0	N0
TCGA-EM-A3SU	499	0	43	FEMALE	unknow	Stage I	T2	MX	N1b
TCGA-ET-A3BO	499	0	44	FEMALE	unknow	Stage I	T3	MX	N1a
TCGA-DJ-A3UP	499	0	38	FEMALE	unknow	Stage I	T2	M0	N0
TCGA-EM-A3AQ	500	0	85	FEMALE	unknow	Stage I	T1b	MX	N0
TCGA-EM-A2CJ	500	0	49	FEMALE	unknow	Stage I	T1b	MX	NX
TCGA-FY-A3R9	504	0	66	FEMALE	unknow	Stage I	T1a	MX	N0
TCGA-BJ-A2N8	504	0	30	FEMALE	unknow	Stage I	T1b	M0	N0
TCGA-BJ-A0ZE	509	0	63	FEMALE	unknow	Stage III	T3	M0	N0
TCGA-EM-A3AR	510	0	41	MALE	unknow	Stage I	T1b	MX	N1a
TCGA-EM-A3FL	511	0	63	FEMALE	unknow	Stage I	T1b	MX	NX
TCGA-IM-A3U3	514	0	55	FEMALE	unknow	Stage I	T1b	MX	N0
TCGA-H2-A26U	517	0	54	FEMALE	unknow	Stage III	T3	MX	N0
TCGA-FY-A3WA	519	0	52	FEMALE	unknow	Stage I	T1a	MX	NX
TCGA-J8-A3NZ	524	0	52	FEMALE	unknow	Stage III	T3	M0	N1a
TCGA-EM-A2P2	526	0	46	MALE	unknow	Stage III	T3	MX	N0
TCGA-ET-A4KN	528	0	51	FEMALE	unknow	Stage III	T3	MX	N0
TCGA-FY-A3YR	528	0	64	FEMALE	unknow	Stage III	T3	MX	N1a
TCGA-EM-A3FP	529	0	71	FEMALE	unknow	Stage II	T2	MX	N0
TCGA-EM-A2P1	531	0	33	MALE	unknow	Stage I	T2	MX	N1b
TCGA-EM-A3FO	532	0	40	MALE	unknow	Stage I	T3	MX	N0
TCGA-DJ-A1QQ	534	0	43	MALE	unknow	Stage I	T3	M0	N0
TCGA-EM-A2OY	535	0	46	FEMALE	unknow	Stage II	T2	MX	N0
TCGA-DJ-A1QL	535	0	70	MALE	unknow	Stage II	T2	M0	N0
TCGA-EM-A2P0	535	0	33	MALE	unknow	Stage I	T2	MX	N1b
TCGA-DJ-A4V0	542	0	36	FEMALE	unknow	Stage I	T2	M0	N0
TCGA-FY-A3I4	542	0	34	FEMALE	unknow	Stage I	T2	M0	N0
TCGA-EM-A2CK	544	0	28	MALE	unknow	Stage I	T2	MX	N1b
TCGA-EM-A1CW	549	0	39	FEMALE	unknow	Stage I	T3	MX	N0
TCGA-FY-A3RA	550	0	21	FEMALE	unknow	Stage I	T2	MX	NX
TCGA-EM-A1CT	553	0	76	MALE	unknow	Stage IVA	T1b	MX	N1b
TCGA-DJ-A4UL	554	0	68	FEMALE	unknow	Stage I	T1b	M0	N0
TCGA-ET-A25P	559	0	24	FEMALE	unknow	Stage I	T1	MX	N0
TCGA-BJ-A2N7	559	0	30	FEMALE	unknow	Stage I	T3	M0	N0
TCGA-DJ-A3UZ	563	0	70	FEMALE	unknow	Stage III	T3	M0	N0
TCGA-DE-A4M8	564	0	61	FEMALE	unknow	Stage III	T2	M0	N1
TCGA-DJ-A13R	565	0	50	MALE	unknow	Stage III	T3	M0	N0
TCGA-BJ-A3PU	567	0	52	MALE	unknow	Stage III	T3	M0	N1a
TCGA-KS-A4I5	567	0	49	FEMALE	unknow	Stage IVA	T1b	M0	N1b
TCGA-DE-A4M9	573	0	28	MALE	unknow	Stage I	T2	M0	NX
TCGA-BJ-A0ZA	574	0	67	FEMALE	unknow	Stage II	T2	M0	N0
TCGA-BJ-A2NA	577	0	77	MALE	unknow	Stage III	T3	M0	N0
TCGA-DJ-A3VE	577	0	50	MALE	unknow	Stage I	T1b	M0	N0
TCGA-EM-A3AJ	577	0	39	MALE	unknow	Stage I	T3	MX	N1a
TCGA-FY-A40N	579	0	55	FEMALE	unknow	Stage I	T1a	MX	N0
TCGA-DJ-A4UQ	580	0	60	MALE	unknow	Stage IVA	T3	M0	N1b
TCGA-DJ-A3V5	584	0	76	FEMALE	unknow	Stage III	T3	M0	N0
TCGA-BJ-A4O8	591	0	47	MALE	unknow	Stage III	T3	M0	N1a
TCGA-EM-A1YB	592	0	73	FEMALE	unknow	Stage II	T2	MX	NX
TCGA-FY-A3ON	595	0	20	MALE	unknow	Stage I	T2	MX	N1
TCGA-DJ-A3UQ	595	0	45	FEMALE	unknow	Stage III	T3	M0	N1a
TCGA-E8-A3X7	596	0	57	FEMALE	unknow	Stage IVA	T4a	M0	N0
TCGA-EM-A3AN	597	0	36	FEMALE	unknow	Stage I	T1b	MX	N1b
TCGA-EM-A2OX	600	0	46	MALE	unknow	Stage IVA	T1b	MX	N1b
TCGA-KS-A4I3	600	0	41	MALE	unknow	Stage I	T3	M0	N1
TCGA-ET-A2N3	601	0	34	FEMALE	unknow	Stage I	T2	MX	NX
TCGA-EM-A1YA	602	0	74	FEMALE	unknow	Stage II	T2	MX	NX
TCGA-DJ-A3V2	615	0	44	FEMALE	unknow	Stage I	T2	M0	N1a
TCGA-FY-A3BL	621	0	29	MALE	unknow	Stage I	T1	M0	NX
TCGA-DJ-A3UN	622	0	51	FEMALE	unknow	Stage I	T1b	M0	N0
TCGA-DJ-A3V9	623	0	50	FEMALE	unknow	Stage IVA	T2	M0	N1b
TCGA-BJ-A2N9	623	0	42	FEMALE	unknow	Stage I	T2	M0	N0
TCGA-BJ-A190	626	0	55	MALE	unknow	Stage II	T2	MX	N0
TCGA-E8-A438	629	0	23	FEMALE	unknow	Stage I	T1b	M0	N0
TCGA-BJ-A18Z	630	0	58	MALE	unknow	Stage IVA	T3	MX	N1b
TCGA-EM-A1CU	636	0	31	MALE	unknow	Stage I	T3	M0	N1a
TCGA-EM-A3FM	639	0	57	MALE	unknow	Stage IVA	T2	MX	N1b
TCGA-BJ-A45E	639	0	46	FEMALE	unknow	Stage I	T1a	M0	N0
TCGA-DJ-A3VD	639	0	32	FEMALE	unknow	Stage I	T1b	M0	N1a
TCGA-BJ-A28S	640	0	79	MALE	unknow	Stage II	T2	M0	N0
TCGA-DJ-A3V8	647	0	28	FEMALE	unknow	Stage I	T3	M0	N1b
TCGA-EM-A4FK	649	0	33	FEMALE	unknow	Stage I	T2	MX	NX
TCGA-DJ-A4UP	649	0	15	FEMALE	unknow	Stage I	T1b	M0	N1b
TCGA-DJ-A3UY	650	0	32	FEMALE	unknow	Stage I	T1b	M0	N0
TCGA-DJ-A3V4	653	0	60	FEMALE	unknow	Stage III	T3	M0	N1a
TCGA-DO-A1K0	655	0	30	FEMALE	unknow	Stage I	T3	MX	N1b
TCGA-EM-A4FR	655	0	28	MALE	unknow	Stage I	T3	MX	N1
TCGA-FY-A4B4	657	0	62	FEMALE	unknow	Stage III	T1b	MX	N1a
TCGA-FY-A3W9	658	0	66	FEMALE	unknow	Stage II	T2	MX	N0
TCGA-DE-A0Y2	658	0	30	FEMALE	unknow	Stage I	T2	M0	N1a
TCGA-BJ-A45J	658	0	39	FEMALE	unknow	Stage I	T1a	M0	N1a
TCGA-H2-A2K9	659	0	25	MALE	unknow	Stage I	T2	MX	N1b
TCGA-L6-A4ET	664	0	49	FEMALE	unknow	Stage IVC	T3	M1	NX
TCGA-IM-A41Y	664	0	42	FEMALE	unknow	Stage I	T3	MX	N1a
TCGA-FK-A3SE	670	0	31	FEMALE	unknow	Stage I	T2	MX	N1a
TCGA-ET-A2MY	672	0	72	FEMALE	unknow	Stage I	T1b	MX	NX
TCGA-EM-A2OV	674	0	64	FEMALE	unknow	Stage II	T2	MX	N0
TCGA-E8-A2EA	678	0	52	FEMALE	unknow	Stage I	T1b	M0	N0
TCGA-J8-A3YG	678	0	54	FEMALE	unknow	Stage III	T2	M0	N1a
TCGA-EM-A4FQ	683	0	42	FEMALE	unknow	Stage I	T2	MX	N1
TCGA-FY-A40M	684	0	51	FEMALE	unknow	Stage I	T1b	MX	N0
TCGA-EM-A3AI	685	0	67	FEMALE	unknow	Stage II	T2	MX	NX
TCGA-ET-A2N1	696	0	47	FEMALE	unknow	Stage III	T2	MX	N1a
TCGA-BJ-A291	696	0	56	FEMALE	unknow	Stage I	T1	M0	N0
TCGA-DJ-A3VB	697	0	52	MALE	unknow	Stage III	T3	M0	N1a
TCGA-BJ-A45K	705	0	33	MALE	unknow	Stage I	T2	M0	N0
TCGA-DJ-A3V7	706	0	44	FEMALE	unknow	Stage III	T3	M0	N0
TCGA-BJ-A3PT	709	0	51	FEMALE	unknow	Stage III	T3	M0	N0
TCGA-FY-A3TY	709	0	61	FEMALE	unknow	Stage III	T3	MX	N0
TCGA-BJ-A18Y	710	0	29	MALE	unknow	Stage I	T1b	MX	N0
TCGA-DJ-A3UU	713	0	49	FEMALE	unknow	Stage III	T3	M0	N0
TCGA-DJ-A3VL	713	0	38	MALE	unknow	Stage I	T1a	M0	N0
TCGA-BJ-A4O9	714	0	51	FEMALE	unknow	Stage II	T2	M0	N0
TCGA-EM-A2CN	715	0	62	MALE	unknow	Stage IVC	T3	M1	N0
TCGA-EM-A3FK	723	0	30	FEMALE	unknow	Stage I	T1b	MX	N1b
TCGA-DJ-A3UV	724	0	18	FEMALE	unknow	Stage I	T1	M0	N0
TCGA-BJ-A45G	725	0	48	FEMALE	unknow	Stage III	T2	M0	N1
TCGA-FY-A40L	726	0	55	FEMALE	unknow	Stage IVA	T4a	MX	N1b
TCGA-EL-A4KI	727	0	63	MALE	unknow	Stage III	T3	MX	N0
TCGA-MK-A84Z	728	0	74	MALE	unknow	Stage III	T3	MX	NX
TCGA-DJ-A3VJ	736	0	22	MALE	unknow	Stage I	T3	M0	N1a
TCGA-DJ-A3UT	737	0	43	FEMALE	unknow	Stage I	T1a	M0	N0
TCGA-EL-A4KG	739	0	35	FEMALE	unknow	Stage I	T3	M0	N0
TCGA-DJ-A4V5	740	0	55	MALE	unknow	Stage IVA	T3	M0	N1b
TCGA-EM-A4FV	744	0	64	FEMALE	unknow	Stage I	T1b	MX	N0
TCGA-J8-A3YF	751	0	83	MALE	unknow	Stage III	T1	M0	N1
TCGA-FE-A233	751	0	18	FEMALE	unknow	Stage I	T2	MX	NX
TCGA-ET-A3DW	752	0	64	MALE	unknow	Stage III	T2	MX	N1
TCGA-ET-A3BT	752	0	60	FEMALE	unknow	Stage IVA	T2	MX	N1b
TCGA-DJ-A3VK	753	0	63	MALE	unknow	Stage III	T3	M0	N0
TCGA-BJ-A0YZ	754	0	65	MALE	unknow	Stage II	T2	M0	N0
TCGA-DJ-A3VA	755	0	39	FEMALE	unknow	Stage I	T1b	M0	N1a
TCGA-ET-A3BP	756	0	34	FEMALE	unknow	Stage I	T2	MX	N1a
TCGA-DE-A4MD	764	0	71	MALE	unknow	Stage IVA	T3	M0	N1b
TCGA-ET-A3DU	770	0	21	FEMALE	unknow	Stage I	T1	MX	N1a
TCGA-E8-A419	774	0	30	FEMALE	unknow	Stage I	T2	M0	N1
TCGA-BJ-A0ZG	775	0	80	MALE	unknow	Stage I	T1	M0	N0
TCGA-IM-A4EB	780	0	37	MALE	unknow	Stage I	T3	MX	N1b
TCGA-DJ-A2PS	797	0	40	FEMALE	unknow	Stage I	T3	M0	N1a
TCGA-EM-A4FN	802	0	49	FEMALE	unknow	Stage IVA	T1b	MX	N1b
TCGA-EM-A4FO	802	0	72	MALE	unknow	Stage I	T1b	MX	N0
TCGA-KS-A4I1	812	0	37	FEMALE	unknow	Stage I	T2	M0	N0
TCGA-EM-A1CS	817	0	55	FEMALE	unknow	Stage I	T1	MX	N0
TCGA-DJ-A3V6	818	0	54	MALE	unknow	Stage III	T3	M0	N0
TCGA-EL-A4KH	823	0	36	FEMALE	unknow	Stage I	T2	M0	N0
TCGA-ET-A25O	824	0	35	FEMALE	unknow	Stage I	T2	MX	N1a
TCGA-J8-A3O1	827	0	33	FEMALE	unknow	Stage I	T3	M0	N1b
TCGA-E8-A437	835	0	57	FEMALE	unknow	Stage I	TX	M0	NX
TCGA-DJ-A2PR	835	0	27	MALE	unknow	Stage I	T3	M0	N1a
TCGA-DJ-A3VM	840	0	68	FEMALE	unknow	Stage II	T2	M0	N0
TCGA-ET-A25M	846	0	33	MALE	unknow	Stage I	T2	MX	N1
TCGA-J8-A3YE	847	0	31	FEMALE	unknow	Stage I	T3	M0	N1
TCGA-EM-A3FJ	850	0	24	FEMALE	unknow	Stage I	T1a	MX	N1b
TCGA-ET-A3BN	859	0	33	FEMALE	unknow	Stage I	T2	MX	NX
TCGA-BJ-A45H	865	0	45	MALE	unknow	Stage III	T3	M0	N0
TCGA-DJ-A2PX	881	0	55	FEMALE	unknow	Stage I	T1b	M0	N0
TCGA-FY-A3NM	885	0	48	FEMALE	unknow	Stage III	T3	MX	N0
TCGA-EM-A4FH	892	0	69	MALE	unknow	Stage III	T3	MX	NX
TCGA-ET-A25R	897	0	51	FEMALE	unknow	Stage III	T3	MX	NX
TCGA-EL-A3N2	902	0	24	FEMALE	unknow	Stage I	T2	M0	N1
TCGA-ET-A25J	903	0	40	FEMALE	unknow	Stage I	T2	MX	N1a
TCGA-DE-A4MC	913	0	43	FEMALE	unknow	Stage I	T3	M0	N1b
TCGA-DE-A4MA	916	0	52	FEMALE	unknow	Stage III	T3	M0	N1a
TCGA-MK-A4N9	919	0	41	FEMALE	unknow	Stage I	T3	M0	N1
TCGA-BJ-A290	919	0	70	MALE	unknow	Stage III	T3	M0	N1a
TCGA-E3-A3E3	922	0	49	FEMALE	unknow	Stage II	T2	M0	N0
TCGA-ET-A25L	926	0	52	FEMALE	unknow	Stage IVA	T3	MX	N1b
TCGA-EL-A4K2	928	0	43	FEMALE	unknow	Stage I	T1	M0	N0
TCGA-DJ-A2PP	930	0	47	MALE	unknow	Stage II	T2	M0	N0
TCGA-DJ-A3V3	931	0	57	FEMALE	unknow	Stage II	T2	M0	N0
TCGA-DJ-A1QF	931	0	61	FEMALE	unknow	Stage II	T2	M0	N0
TCGA-BJ-A28X	942	0	32	FEMALE	unknow	Stage I	T3	M0	N1a
TCGA-DJ-A3UM	944	0	45	FEMALE	unknow	Stage I	T1b	M0	N0
TCGA-EL-A4K0	944	0	54	FEMALE	unknow	Stage I	T1	M0	N0
TCGA-E3-A3DY	945	0	37	MALE	unknow	Stage I	T3	M0	N1a
TCGA-IM-A41Z	946	0	37	FEMALE	unknow	Stage I	T1b	MX	N0
TCGA-E8-A242	950	0	56	FEMALE	unknow	Stage III	T3	MX	N0
TCGA-ET-A4KQ	955	0	45	FEMALE	unknow	Stage II	T2	MX	NX
TCGA-DJ-A3UO	957	0	63	MALE	unknow	Stage IVA	T3	M0	N1b
TCGA-EL-A3ZK	958	0	41	FEMALE	unknow	Stage I	T2	M0	N1
TCGA-FE-A231	961	0	70	MALE	unknow	Stage IVA	T3	MX	N1b
TCGA-J8-A3YD	968	0	47	FEMALE	unknow	Stage III	T1b	M0	N1a
TCGA-DJ-A2PV	973	0	53	FEMALE	unknow	Stage II	T2	M0	N0
TCGA-ET-A25K	984	0	36	FEMALE	unknow	Stage I	T2	MX	N1a
TCGA-MK-A4N7	987	0	20	FEMALE	unknow	Stage I	T2	M0	N0
TCGA-BJ-A28V	987	0	80	FEMALE	unknow	Stage III	T3	MX	N0
TCGA-KS-A4I7	987	0	61	FEMALE	unknow	Stage I	T1b	M0	N0
TCGA-EL-A3T2	988	0	55	FEMALE	unknow	Stage III	T2	M0	N1
TCGA-DJ-A3US	998	0	37	FEMALE	unknow	Stage I	T1b	M0	N0
TCGA-KS-A4ID	1011	0	55	FEMALE	unknow	Stage I	T1	M0	N0
TCGA-L6-A4EP	1016	0	41	FEMALE	unknow	Stage I	T2	M0	N0
TCGA-DJ-A2QA	1020	0	56	FEMALE	unknow	Stage III	T3	M0	N0
TCGA-DJ-A2Q4	1032	0	53	MALE	unknow	Stage III	T1b	M0	N1a
TCGA-DJ-A2PU	1033	0	52	FEMALE	unknow	Stage II	T2	M0	N0
TCGA-DJ-A2Q0	1045	0	57	FEMALE	unknow	Stage II	T2	M0	N0
TCGA-EL-A4K1	1046	0	68	FEMALE	unknow	Stage III	T3	M0	N1
TCGA-EL-A4JW	1056	0	38	FEMALE	unknow	Stage I	T1	M0	N0
TCGA-DJ-A2PW	1060	0	65	MALE	unknow	Stage III	T3	M0	N1a
TCGA-DJ-A2Q7	1068	0	52	FEMALE	unknow	Stage III	T2	M0	N1a
TCGA-DJ-A2QB	1070	0	53	FEMALE	unknow	Stage IVA	T3	M0	N1b
TCGA-KS-A4IC	1073	0	45	FEMALE	unknow	Stage III	T1b	M0	N1a
TCGA-DJ-A2PQ	1077	0	26	MALE	unknow	Stage I	T2	M0	N1a
TCGA-BJ-A28T	1081	0	34	FEMALE	unknow	Stage I	T1	M0	N1a
TCGA-DJ-A3VG	1085	0	40	MALE	unknow	Stage I	T1b	M0	N0
TCGA-DE-A0XZ	1090	0	65	FEMALE	unknow	Stage III	T1	M0	N1a
TCGA-DJ-A2Q9	1092	0	65	FEMALE	unknow	Stage III	T1b	M0	N1a
TCGA-EL-A3ZM	1096	0	60	MALE	unknow	Stage IVA	T4a	M0	N1
TCGA-MK-A4N6	1098	0	35	MALE	unknow	Stage I	T3	M0	N1b
TCGA-DJ-A3UR	1105	0	51	FEMALE	unknow	Stage III	T3	M0	N1a
TCGA-DJ-A2Q6	1109	0	38	FEMALE	unknow	Stage I	T1b	M0	N1b
TCGA-DJ-A3V0	1125	0	56	MALE	unknow	Stage IVA	T4a	M0	N1b
TCGA-ET-A40T	1140	0	26	FEMALE	unknow	Stage I	T2	MX	N1a
TCGA-DJ-A2Q5	1140	0	51	MALE	unknow	Stage IVA	T2	M0	N1b
TCGA-DE-A2OL	1145	0	44	FEMALE	unknow	Stage I	T2	MX	NX
TCGA-DJ-A2Q1	1148	0	44	FEMALE	unknow	Stage I	T1b	M0	N1b
TCGA-EL-A3CV	1154	0	40	MALE	unknow	Stage I	T3	M0	N1b
TCGA-EL-A4JZ	1154	0	55	FEMALE	unknow	Stage III	T3	M0	N1a
TCGA-DJ-A13O	1161	0	56	MALE	unknow	Stage I	T1b	M0	N0
TCGA-ET-A3BU	1165	0	28	MALE	unknow	Stage I	T1	MX	N1a
TCGA-ET-A3BQ	1168	0	27	FEMALE	unknow	Stage I	T2	MX	N0
TCGA-DJ-A2PT	1181	0	70	FEMALE	unknow	Stage III	T3	M0	N0
TCGA-DJ-A2Q8	1189	0	47	FEMALE	unknow	Stage I	T1a	M0	N0
TCGA-FE-A238	1215	0	36	FEMALE	unknow	Stage I	T3	MX	N0
TCGA-DJ-A2QC	1215	0	70	FEMALE	unknow	Stage II	T2	M0	N0
TCGA-BJ-A0ZF	1217	0	54	FEMALE	unknow	Stage II	T2	M0	N0
TCGA-E3-A3E1	1223	0	46	FEMALE	unknow	Stage I	T1	M0	N0
TCGA-ET-A40S	1223	0	62	MALE	unknow	Stage II	T2	MX	N0
TCGA-DJ-A2Q3	1224	0	61	FEMALE	unknow	Stage III	T3	M0	N1a
TCGA-L6-A4EQ	1228	0	47	MALE	unknow	Stage III	T2	M0	N1a
TCGA-EL-A4K7	1251	0	74	MALE	unknow	Stage III	T2	M0	N1
TCGA-EM-A22P	1256	0	64	MALE	unknow	Stage IVA	T1b	MX	N1b
TCGA-EL-A3T7	1256	0	47	FEMALE	unknow	Stage II	T2	M0	N0
TCGA-BJ-A0Z9	1257	0	57	FEMALE	unknow	Stage III	T3	MX	N0
TCGA-BJ-A0ZJ	1280	0	36	MALE	unknow	Stage I	T2	M0	N1a
TCGA-BJ-A28R	1282	0	38	FEMALE	unknow	Stage I	T1	M0	N0
TCGA-ET-A3BV	1285	0	47	FEMALE	unknow	Stage III	T2	MX	N1a
TCGA-DJ-A1QH	1293	0	58	FEMALE	unknow	Stage III	T3	M0	N1a
TCGA-DJ-A1QN	1295	0	42	FEMALE	unknow	Stage I	T1b	M0	N0
TCGA-DJ-A13V	1313	0	21	FEMALE	unknow	Stage I	T3	M0	N1a
TCGA-J8-A3O0	1313	0	38	MALE	unknow	Stage I	T2	M0	N0
TCGA-EL-A3H3	1319	0	19	FEMALE	unknow	Stage I	T2	M0	N1
TCGA-ET-A3DR	1323	0	42	FEMALE	unknow	Stage I	T1	MX	N1a
TCGA-EL-A4KD	1326	0	41	MALE	unknow	Stage I	T3	M0	N1
TCGA-DJ-A2Q2	1337	0	57	FEMALE	unknow	Stage III	T3	M0	N0
TCGA-ET-A40P	1338	0	32	FEMALE	unknow	Stage I	T2	MX	N0
TCGA-EL-A4K6	1343	0	75	MALE	unknow	Stage IV	T4	MX	N1
TCGA-EM-A22O	1344	0	75	MALE	unknow	Stage IVA	T4a	MX	N1a
TCGA-BJ-A192	1349	0	54	FEMALE	unknow	Stage III	T3	M0	NX
TCGA-ET-A40R	1350	0	24	FEMALE	unknow	Stage I	T2	MX	N1a
TCGA-ET-A3DQ	1367	0	43	FEMALE	unknow	Stage I	T1	MX	N0
TCGA-DJ-A1QG	1368	0	62	MALE	unknow	Stage I	T1b	M0	N0
TCGA-EL-A3D4	1381	0	62	MALE	unknow	Stage IVA	T3	M0	N1b
TCGA-ET-A2N5	1393	0	46	FEMALE	unknow	Stage III	T3	MX	NX
TCGA-EL-A4JX	1398	0	31	FEMALE	unknow	Stage I	T3	MX	N0
TCGA-ET-A40Q	1407	0	38	MALE	unknow	Stage I	T3	MX	N1b
TCGA-IM-A3ED	1442	0	58	FEMALE	unknow	Stage I	T1	MX	N0
TCGA-DJ-A1QO	1442	0	69	MALE	unknow	Stage III	T3	M0	N0
TCGA-ET-A25G	1444	0	56	FEMALE	unknow	Stage III	T3	MX	N0
TCGA-EL-A4K9	1455	0	68	MALE	unknow	Stage II	T2	M0	N0
TCGA-DJ-A1QD	1462	0	20	FEMALE	unknow	Stage I	T2	M0	N1b
TCGA-FK-A3SH	1463	0	50	FEMALE	unknow	Stage III	T2	MX	N1a
TCGA-ET-A25I	1466	0	37	FEMALE	unknow	Stage I	T2	MX	N0
TCGA-EM-A1CV	1475	0	32	FEMALE	unknow	Stage I	T1	MX	N0
TCGA-DJ-A13M	1484	0	28	FEMALE	unknow	Stage I	T1b	M0	N0
TCGA-IM-A3EB	1488	0	32	FEMALE	unknow	Stage I	T3	MX	N1a
TCGA-EL-A3H4	1512	0	46	FEMALE	unknow	Stage IVA	T4a	M0	N1
TCGA-BJ-A0Z2	1514	0	57	MALE	unknow	Stage IVC	T2	M1	N0
TCGA-DE-A0Y3	1526	0	60	FEMALE	unknow	Stage IVC	T4a	M1	N1b
TCGA-EL-A3GW	1527	0	37	FEMALE	unknow	Stage I	T2	M0	N0
TCGA-EL-A3GQ	1528	0	72	FEMALE	unknow	Stage I	T1	M0	N0
TCGA-EL-A3GV	1532	0	65	FEMALE	unknow	Stage III	T3	M0	N0
TCGA-DJ-A13U	1590	0	60	MALE	unknow	Stage III	T3	M0	N0
TCGA-DJ-A13W	1593	0	45	FEMALE	unknow	Stage I	T1b	M0	N0
TCGA-EL-A3ZP	1597	0	19	MALE	unknow	Stage I	T4	M0	N1
TCGA-EL-A3ZN	1614	0	28	FEMALE	unknow	Stage I	T3	M0	N1
TCGA-EL-A4K4	1623	0	33	FEMALE	unknow	Stage I	T3	M0	N1
TCGA-ET-A2MX	1644	0	27	MALE	unknow	Stage I	T2	MX	N1a
TCGA-EM-A1YE	1645	0	47	FEMALE	unknow	Stage II	T2	MX	N0
TCGA-DO-A1JZ	1670	0	23	FEMALE	unknow	Stage I	T2	MX	NX
TCGA-ET-A39S	1676	0	27	FEMALE	unknow	Stage I	T1	MX	N0
TCGA-DJ-A13T	1709	0	37	FEMALE	unknow	Stage I	T2	M0	N0
TCGA-ET-A3DP	1730	0	43	FEMALE	unknow	Stage I	T2	MX	NX
TCGA-EM-A1YD	1734	0	53	FEMALE	unknow	Stage II	T2	MX	N0
TCGA-ET-A39R	1737	0	24	FEMALE	unknow	Stage I	T1	MX	N0
TCGA-EL-A3D5	1737	0	44	FEMALE	unknow	Stage I	T3	M0	N1b
TCGA-EL-A4JV	1748	0	41	FEMALE	unknow	Stage I	T2	M0	N0
TCGA-ET-A39P	1786	0	73	FEMALE	unknow	Stage III	T3	MX	N0
TCGA-EL-A3CZ	1788	0	37	FEMALE	unknow	Stage I	T1	M0	N1a
TCGA-ET-A39T	1799	0	55	FEMALE	unknow	Stage III	T3	MX	N0
TCGA-EL-A3ZT	1808	0	35	MALE	unknow	Stage I	T3	M0	N0
TCGA-DJ-A3UW	1812	0	50	FEMALE	unknow	Stage I	T1b	M0	N0
TCGA-EL-A3ZR	1830	0	46	FEMALE	unknow	Stage II	T2	M0	N0
TCGA-EM-A4FU	1840	0	35	MALE	unknow	Stage I	T3	MX	NX
TCGA-ET-A39O	1856	0	39	MALE	unknow	Stage I	T1	MX	N0
TCGA-EL-A3ZQ	1862	0	78	FEMALE	unknow	Stage II	T2	M0	N0
TCGA-EL-A3ZL	1895	0	34	FEMALE	unknow	Stage I	T1	M0	N1
TCGA-E3-A3E2	1922	0	34	FEMALE	unknow	Stage I	T1	MX	N1a
TCGA-EL-A3GO	1973	0	31	FEMALE	unknow	Stage I	T2	M0	N0
TCGA-ET-A39L	1988	0	20	FEMALE	unknow	Stage I	T3	MX	N0
TCGA-EL-A3GS	1989	0	37	FEMALE	unknow	Stage I	T3	M0	N1
TCGA-E3-A3E0	2019	0	34	FEMALE	unknow	Stage I	T2	MX	N0
TCGA-FE-A236	2031	0	33	MALE	unknow	Stage I	T2	MX	N1
TCGA-EL-A3TA	2035	0	42	MALE	unknow	Stage I	T2	M0	N0
TCGA-FE-A234	2075	0	26	FEMALE	unknow	Stage I	T2	MX	N1
TCGA-ET-A39J	2160	0	23	FEMALE	unknow	Stage I	T2	MX	NX
TCGA-FK-A3S3	2162	0	43	FEMALE	unknow	Stage I	T3	MX	N1b
TCGA-FE-A230	2173	0	30	FEMALE	unknow	Stage I	T3	MX	N1a
TCGA-ET-A39K	2205	0	48	FEMALE	unknow	Stage III	T3	MX	N1a
TCGA-EL-A3ZO	2211	0	79	FEMALE	unknow	Stage III	T3	M0	N1
TCGA-FE-A22Z	2243	0	61	FEMALE	unknow	Stage IVA	T4a	MX	N1
TCGA-EM-A1YC	2391	0	71	FEMALE	unknow	Stage III	T3	MX	N0
TCGA-FE-A3PD	2396	0	17	FEMALE	unknow	Stage I	T2	MX	N0
TCGA-EL-A3ZH	2402	0	42	FEMALE	unknow	Stage I	T3	M0	N1
TCGA-FE-A232	2424	0	44	FEMALE	unknow	Stage I	T3	MX	NX
TCGA-ET-A3DO	2458	0	33	FEMALE	unknow	Stage I	T2	MX	NX
TCGA-EL-A3CX	2461	0	22	FEMALE	unknow	Stage I	T2	M0	N0
TCGA-FE-A23A	2489	0	27	FEMALE	unknow	Stage I	T2	MX	N0
TCGA-EL-A3TB	2519	0	47	FEMALE	unknow	Stage III	T3	M0	N1a
TCGA-ET-A39N	2535	0	35	FEMALE	unknow	Stage I	T3	MX	NX
TCGA-EL-A3H5	2542	0	57	FEMALE	unknow	Stage IVA	T4	M0	N1
TCGA-EM-A4FF	2573	0	40	FEMALE	unknow	Stage I	T1b	MX	N1
TCGA-KS-A4IB	2577	0	41	FEMALE	unknow	Stage I	T2	M0	N1
TCGA-ET-A39M	2582	0	34	MALE	unknow	Stage I	T2	MX	NX
TCGA-FE-A3PB	2590	0	33	FEMALE	unknow	Stage I	T3	MX	N1a
TCGA-FE-A3PC	2606	0	37	FEMALE	unknow	Stage I	T3	MX	N1
TCGA-KS-A4I9	2658	0	46	FEMALE	unknow	Stage I	T1b	M0	N0
TCGA-EL-A3ZG	2724	0	15	MALE	unknow	Stage I	T3	M0	N0
TCGA-EL-A3T6	2988	0	34	FEMALE	unknow	Stage I	T3	M0	N0
TCGA-EL-A3D1	2997	0	39	MALE	unknow	Stage I	T2	M0	N0
TCGA-EL-A3GY	3076	0	40	FEMALE	unknow	Stage II	T1	M1	N1
TCGA-FE-A3PA	3235	0	16	MALE	unknow	Stage II	T4	M1	N0
TCGA-EL-A3T8	3269	0	36	MALE	unknow	Stage I	T2	M0	N0
TCGA-EL-A3D6	3296	0	51	FEMALE	unknow	Stage III	T3	M0	N1b
TCGA-EL-A3MW	3305	0	55	FEMALE	unknow	Stage II	T2	M0	N0
TCGA-FE-A237	3431	0	19	FEMALE	unknow	Stage I	T3	MX	N1
TCGA-KS-A41L	3463	0	39	FEMALE	unknow	Stage I	T2	M0	N0
TCGA-EL-A3GR	3501	0	31	FEMALE	unknow	Stage I	T3	M0	NX
TCGA-FK-A4UB	3531	0	51	MALE	unknow	Stage III	T3	MX	N1a
TCGA-FE-A235	3571	0	26	FEMALE	unknow	Stage I	T2	MX	N1
TCGA-EL-A3T1	3941	0	38	FEMALE	unknow	Stage I	T2	M0	N0
TCGA-EL-A3H8	3989	0	35	FEMALE	unknow	Stage I	T3	M0	N1
TCGA-EL-A3T3	4017	0	63	MALE	unknow	Stage II	T2	M0	N0
TCGA-ET-A3DV	4026	0	68	FEMALE	unknow	Stage II	T3	MX	N0
TCGA-DJ-A1QE	4134	0	62	FEMALE	unknow	Stage III	T3	M0	N0
TCGA-EL-A3GU	4137	0	72	FEMALE	unknow	Stage III	T3	M0	N1
TCGA-EL-A3H7	4228	0	36	FEMALE	unknow	Stage I	T3	M0	N1
TCGA-EL-A3D0	4254	0	61	MALE	unknow	Stage III	T4	M0	N1b
TCGA-EL-A3GZ	4258	0	34	FEMALE	unknow	Stage I	T1	M0	N0
TCGA-EL-A3T0	4335	0	45	FEMALE	unknow	Stage III	T3	M0	N1
TCGA-KS-A41F	4367	0	37	FEMALE	unknow	Stage I	T2	M0	N1
TCGA-EL-A3GX	4494	0	41	FEMALE	unknow	Stage I	T2	M0	N1
TCGA-EL-A3CN	4731	0	47	FEMALE	unknow	Stage II	T3	M0	N0
TCGA-EL-A3CU	4780	0	70	FEMALE	unknow	Stage III	T1	M0	N1a
TCGA-EL-A3CP	4831	0	50	FEMALE	unknow	unknow	T1	M0	NX
TCGA-DJ-A13P	5150	0	52	FEMALE	unknow	Stage II	T2	M0	N0
TCGA-EL-A3N3	5423	0	53	FEMALE	unknow	Stage II	T3	M0	NX
TCGA-EL-A3T9	174	1	69	FEMALE	unknow	Stage IV	T4	MX	N1
TCGA-EL-A3CR	233	1	78	FEMALE	unknow	Stage III	T3	M0	N1b
TCGA-BJ-A45C	243	1	78	MALE	unknow	Stage III	T3	M0	N0
TCGA-EL-A3MY	533	1	81	MALE	unknow	Stage IVC	T4	M1	NX
TCGA-EL-A3CO	726	1	88	MALE	unknow	Stage III	T3	M0	N1b
TCGA-EL-A3CM	813	1	64	FEMALE	unknow	Stage III	T3	M0	N1b
TCGA-EL-A3CW	938	1	87	FEMALE	unknow	Stage III	T2	M0	N1a
TCGA-EL-A3CL	963	1	70	FEMALE	unknow	Stage II	T2	M0	NX
TCGA-ET-A39I	1011	1	83	FEMALE	unknow	Stage I	T1	MX	NX
TCGA-EL-A3H2	1019	1	58	MALE	unknow	Stage II	T2	MX	N0
TCGA-FE-A239	1023	1	82	MALE	unknow	Stage III	T3	MX	N0
TCGA-EL-A3CS	1385	1	62	FEMALE	unknow	Stage IVA	T4a	M0	N0
TCGA-EL-A3H1	1500	1	66	FEMALE	unknow	Stage I	T1	M0	N0
TCGA-EL-A3MZ	1597	1	66	MALE	unknow	Stage III	T4	MX	N1
TCGA-EL-A3MX	1753	1	66	FEMALE	unknow	Stage IVC	T4	M1	N1
TCGA-EL-A3CT	1854	1	78	FEMALE	unknow	Stage IVA	T4a	M0	N1a
