# Supplementary material for: Development and validation of a survival model for thyroid carcinoma based on autophagy-associated genes
Source: Aging (Albany NY). 2020 Oct 14;12(19):19129–46. doi: 10.18632/aging.103715 (PMC7732287; doi:10.18632/aging.103715)
Supplement: Supplementary Table 2 [file aging-12-103715-s002..xlsx]

## Sheet: GO analysis
Supplementary Table 2. Gene Ontology and KEGG enrichment analysis of ARGs.
ONTOLOGY	ID	Description	pvalue	p.adjust	qvalue	geneID	Count
BP	GO:0070997	neuron death	4.49654e-10	4.55113e-07	2.46063e-07	BCL2/BID/BAX/BCL2L1/CX3CL1/GRID2/FOS/TP63/CCL2	9
BP	GO:0051402	neuron apoptotic process	6.52959e-10	4.55113e-07	2.46063e-07	BCL2/BID/BAX/BCL2L1/CX3CL1/GRID2/TP63/CCL2	8
BP	GO:0097193	intrinsic apoptotic signaling pathway	3.74274e-09	1.73913e-06	9.40282e-07	ITPR1/BCL2/BID/BAX/BCL2L1/DAPK2/PPP1R15A/TP63	8
BP	GO:0046902	regulation of mitochondrial membrane permeability	5.14242e-08	1.7122e-05	9.25721e-06	BCL2/BID/BAX/BCL2L1/TP63	5
BP	GO:0001844	protein insertion into mitochondrial membrane involved in apoptotic signaling pathway	6.1413e-08	1.7122e-05	9.25721e-06	BCL2/BID/BAX/TP63	4
BP	GO:0090559	regulation of membrane permeability	8.70562e-08	1.8723e-05	1.01228e-05	BCL2/BID/BAX/BCL2L1/TP63	5
BP	GO:0051204	protein insertion into mitochondrial membrane	9.41073e-08	1.8723e-05	1.01228e-05	BCL2/BID/BAX/TP63	4
BP	GO:1901030	positive regulation of mitochondrial outer membrane permeabilization involved in apoptotic signaling pathway	1.07449e-07	1.8723e-05	1.01228e-05	BCL2/BID/BAX/TP63	4
BP	GO:1901214	regulation of neuron death	1.27076e-07	1.96827e-05	1.06417e-05	BCL2/BAX/BCL2L1/CX3CL1/GRID2/FOS/CCL2	7
BP	GO:0006914	autophagy	1.60499e-07	2.03396e-05	1.09969e-05	ITPR1/BCL2/TP53INP2/MAP1LC3C/ITGB4/DRAM1/DAPK2/ATG9B	8
BP	GO:0061919	process utilizing autophagic mechanism	1.60499e-07	2.03396e-05	1.09969e-05	ITPR1/BCL2/TP53INP2/MAP1LC3C/ITGB4/DRAM1/DAPK2/ATG9B	8
BP	GO:0008630	intrinsic apoptotic signaling pathway in response to DNA damage	2.77424e-07	3.01289e-05	1.62896e-05	BCL2/BID/BAX/BCL2L1/TP63	5
BP	GO:1901028	regulation of mitochondrial outer membrane permeabilization involved in apoptotic signaling pathway	3.00013e-07	3.01289e-05	1.62896e-05	BCL2/BID/BAX/TP63	4
BP	GO:0043523	regulation of neuron apoptotic process	3.02586e-07	3.01289e-05	1.62896e-05	BCL2/BAX/BCL2L1/CX3CL1/GRID2/CCL2	6
BP	GO:0051205	protein insertion into membrane	5.25396e-07	4.88268e-05	2.63988e-05	BCL2/BID/BAX/TP63	4
BP	GO:0008637	apoptotic mitochondrial changes	6.50298e-07	5.66572e-05	3.06325e-05	BCL2/BID/BAX/BCL2L1/TP63	5
BP	GO:0097345	mitochondrial outer membrane permeabilization	7.33311e-07	6.01315e-05	3.25109e-05	BCL2/BID/BAX/TP63	4
BP	GO:2001233	regulation of apoptotic signaling pathway	8.32344e-07	6.44605e-05	3.48514e-05	BCL2/BID/BAX/BCL2L1/CX3CL1/DAPK2/TP63	7
BP	GO:0007006	mitochondrial membrane organization	9.64333e-07	7.07516e-05	3.82528e-05	BCL2/BID/BAX/BCL2L1/TP63	5
BP	GO:1902110	positive regulation of mitochondrial membrane permeability involved in apoptotic process	1.15252e-06	7.65052e-05	4.13636e-05	BCL2/BID/BAX/TP63	4
BP	GO:2001244	positive regulation of intrinsic apoptotic signaling pathway	1.15252e-06	7.65052e-05	4.13636e-05	BCL2/BID/BAX/BCL2L1	4
BP	GO:0001836	release of cytochrome c from mitochondria	1.23671e-06	7.69831e-05	4.16219e-05	BCL2/BID/BAX/BCL2L1	4
BP	GO:0070059	intrinsic apoptotic signaling pathway in response to endoplasmic reticulum stress	1.32539e-06	7.69831e-05	4.16219e-05	ITPR1/BCL2/BAX/PPP1R15A	4
BP	GO:1902686	mitochondrial outer membrane permeabilization involved in programmed cell death	1.32539e-06	7.69831e-05	4.16219e-05	BCL2/BID/BAX/TP63	4
BP	GO:0035794	positive regulation of mitochondrial membrane permeability	1.51682e-06	8.4578e-05	4.57282e-05	BCL2/BID/BAX/TP63	4
BP	GO:0043524	negative regulation of neuron apoptotic process	1.70431e-06	8.60328e-05	4.65148e-05	BCL2/BAX/BCL2L1/CX3CL1/CCL2	5
BP	GO:1902108	regulation of mitochondrial membrane permeability involved in apoptotic process	1.72806e-06	8.60328e-05	4.65148e-05	BCL2/BID/BAX/TP63	4
BP	GO:1905710	positive regulation of membrane permeability	1.72806e-06	8.60328e-05	4.65148e-05	BCL2/BID/BAX/TP63	4
BP	GO:0051881	regulation of mitochondrial membrane potential	2.35136e-06	0.000113027	6.11097e-05	BCL2/BID/BAX/BCL2L1	4
BP	GO:2001242	regulation of intrinsic apoptotic signaling pathway	2.66648e-06	0.000121861	6.58855e-05	BCL2/BID/BAX/BCL2L1/DAPK2	5
BP	GO:0038034	signal transduction in absence of ligand	2.79737e-06	0.000121861	6.58855e-05	BCL2/BAX/BCL2L1/CX3CL1	4
BP	GO:0097192	extrinsic apoptotic signaling pathway in absence of ligand	2.79737e-06	0.000121861	6.58855e-05	BCL2/BAX/BCL2L1/CX3CL1	4
BP	GO:0048245	eosinophil chemotaxis	3.22648e-06	0.000136294	7.36894e-05	CX3CL1/DAPK2/CCL2	3
BP	GO:2001235	positive regulation of apoptotic signaling pathway	3.48173e-06	0.000142751	7.71801e-05	BCL2/BID/BAX/BCL2L1/TP63	5
BP	GO:0032469	endoplasmic reticulum calcium ion homeostasis	3.73244e-06	0.000148658	8.03738e-05	ITPR1/BCL2/BAX	3
BP	GO:0010821	regulation of mitochondrion organization	4.12596e-06	0.000159766	8.63797e-05	BCL2/BID/BAX/BCL2L1/TP63	5
BP	GO:1905475	regulation of protein localization to membrane	4.24187e-06	0.000159815	8.64061e-05	BCL2/BID/BCL2L1/ITGA3/TP63	5
BP	GO:1900739	regulation of protein insertion into mitochondrial membrane involved in apoptotic signaling pathway	4.89635e-06	0.000175013	9.46231e-05	BCL2/BID/TP63	3
BP	GO:1900740	positive regulation of protein insertion into mitochondrial membrane involved in apoptotic signaling pathway	4.89635e-06	0.000175013	9.46231e-05	BCL2/BID/TP63	3
BP	GO:0008625	extrinsic apoptotic signaling pathway via death domain receptors	5.48673e-06	0.000189001	0.000102186	BCL2/BID/BAX/BCL2L1	4
BP	GO:0072677	eosinophil migration	5.55885e-06	0.000189001	0.000102186	CX3CL1/DAPK2/CCL2	3
BP	GO:1901215	negative regulation of neuron death	7.88395e-06	0.000261672	0.000141476	BCL2/BAX/BCL2L1/CX3CL1/CCL2	5
BP	GO:1902230	negative regulation of intrinsic apoptotic signaling pathway in response to DNA damage	1.08033e-05	0.000350227	0.000189355	BCL2/BID/BCL2L1	3
BP	GO:0007160	cell-matrix adhesion	1.27624e-05	0.00039535	0.000213751	BCL2/ITGA3/CX3CL1/CDKN2A/ITGB4	5
BP	GO:2001234	negative regulation of apoptotic signaling pathway	1.27624e-05	0.00039535	0.000213751	BCL2/BID/BAX/BCL2L1/CX3CL1	5
BP	GO:0097191	extrinsic apoptotic signaling pathway	1.33278e-05	0.00040389	0.000218368	BCL2/BID/BAX/BCL2L1/CX3CL1	5
BP	GO:1901099	negative regulation of signal transduction in absence of ligand	1.56717e-05	0.000455131	0.000246073	BCL2/BCL2L1/CX3CL1	3
BP	GO:2001240	negative regulation of extrinsic apoptotic signaling pathway in absence of ligand	1.56717e-05	0.000455131	0.000246073	BCL2/BCL2L1/CX3CL1	3
BP	GO:0010822	positive regulation of mitochondrion organization	1.71962e-05	0.000489213	0.000264499	BCL2/BID/BAX/TP63	4
BP	GO:0006839	mitochondrial transport	1.89657e-05	0.000528762	0.000285882	BCL2/BID/BAX/BCL2L1/TP63	5
BP	GO:0046660	female sex differentiation	2.11257e-05	0.000574426	0.000310571	BCL2/BAX/BCL2L1/TP63	4
BP	GO:1902229	regulation of intrinsic apoptotic signaling pathway in response to DNA damage	2.18014e-05	0.000574426	0.000310571	BCL2/BID/BCL2L1	3
BP	GO:1905477	positive regulation of protein localization to membrane	2.18397e-05	0.000574426	0.000310571	BCL2/BID/ITGA3/TP63	4
BP	GO:0000082	G1/S transition of mitotic cell cycle	2.88468e-05	0.000744542	0.000402546	BCL2/BID/BAX/CDKN2A/CCL2	5
BP	GO:0034976	response to endoplasmic reticulum stress	2.93757e-05	0.000744542	0.000402546	ITPR1/BCL2/BAX/PPP1R15A/CCL2	5
BP	GO:0072655	establishment of protein localization to mitochondrion	3.5844e-05	0.000879851	0.000475703	BCL2/BID/BAX/TP63	4
BP	GO:2001239	regulation of extrinsic apoptotic signaling pathway in absence of ligand	3.59767e-05	0.000879851	0.000475703	BCL2/BCL2L1/CX3CL1	3
BP	GO:0090199	regulation of release of cytochrome c from mitochondria	3.83938e-05	0.000922776	0.000498911	BID/BAX/BCL2L1	3
BP	GO:0070585	protein localization to mitochondrion	4.01838e-05	0.000935295	0.00050568	BCL2/BID/BAX/TP63	4
BP	GO:0044843	cell cycle G1/S phase transition	4.02566e-05	0.000935295	0.00050568	BCL2/BID/BAX/CDKN2A/CCL2	5
BP	GO:0060402	calcium ion transport into cytosol	5.27081e-05	0.00120451	0.000651233	ITPR1/BCL2/BAX/CX3CL1	4
BP	GO:0010332	response to gamma radiation	5.51585e-05	0.00124018	0.000670518	BCL2/BAX/BCL2L1	3
BP	GO:0010506	regulation of autophagy	5.66502e-05	0.0012535	0.00067772	ITPR1/BCL2/TP53INP2/DRAM1/DAPK2	5
BP	GO:2001236	regulation of extrinsic apoptotic signaling pathway	6.30275e-05	0.00135419	0.000732163	BCL2/BID/BCL2L1/CX3CL1	4
BP	GO:0007568	aging	6.40994e-05	0.00135419	0.000732163	BCL2/CX3CL1/CDKN2A/FOS/TP63	5
BP	GO:0001541	ovarian follicle development	6.50868e-05	0.00135419	0.000732163	BCL2/BAX/BCL2L1	3
BP	GO:1903749	positive regulation of establishment of protein localization to mitochondrion	6.50868e-05	0.00135419	0.000732163	BCL2/BID/TP63	3
BP	GO:0060401	cytosolic calcium ion transport	7.12512e-05	0.00146065	0.000789719	ITPR1/BCL2/BAX/CX3CL1	4
BP	GO:0001655	urogenital system development	7.55551e-05	0.00152643	0.000825285	BCL2/BAX/ITGA3/ITGB4/TP63	5
BP	GO:2000045	regulation of G1/S transition of mitotic cell cycle	8.02318e-05	0.00159776	0.000863849	BCL2/BID/BAX/CCL2	4
BP	GO:0006986	response to unfolded protein	8.60006e-05	0.00168852	0.00091292	BAX/DNAJB1/PPP1R15A/CCL2	4
BP	GO:0031589	cell-substrate adhesion	9.49715e-05	0.00183875	0.000994146	BCL2/ITGA3/CX3CL1/CDKN2A/ITGB4	5
BP	GO:0010623	programmed cell death involved in cell development	0.000103729	0.00198081	0.00107095	BCL2/BAX	2
BP	GO:1902806	regulation of cell cycle G1/S phase transition	0.000122003	0.00229827	0.00124259	BCL2/BID/BAX/CCL2	4
BP	GO:0097284	hepatocyte apoptotic process	0.000124368	0.00231158	0.00124979	BID/BCL2L1	2
BP	GO:1903747	regulation of establishment of protein localization to mitochondrion	0.000126863	0.00232694	0.00125809	BCL2/BID/TP63	3
BP	GO:0035966	response to topologically incorrect protein	0.000132488	0.00239855	0.00129681	BAX/DNAJB1/PPP1R15A/CCL2	4
BP	GO:0007565	female pregnancy	0.000137969	0.00246575	0.00133314	BCL2/ITGA3/CTSB/FOS	4
BP	GO:0072332	intrinsic apoptotic signaling pathway by p53 class mediator	0.000162016	0.00285886	0.00154568	BCL2/BAX/TP63	3
BP	GO:2001021	negative regulation of response to DNA damage stimulus	0.000188644	0.00328713	0.00177723	BCL2/BID/BCL2L1	3
BP	GO:0010810	regulation of cell-substrate adhesion	0.000194972	0.00335544	0.00181416	BCL2/ITGA3/CX3CL1/CDKN2A	4
BP	GO:0048070	regulation of developmental pigmentation	0.000225342	0.00383082	0.00207118	BCL2/BAX	2
BP	GO:0051090	regulation of DNA-binding transcription factor activity	0.000239435	0.00387977	0.00209765	PRKCQ/CX3CL1/CDKN2A/SPHK1/FOS	5
BP	GO:0044706	multi-multicellular organism process	0.000241364	0.00387977	0.00209765	BCL2/ITGA3/CTSB/FOS	4
BP	GO:0042475	odontogenesis of dentin-containing tooth	0.000241789	0.00387977	0.00209765	BAX/ITGB4/TP63	3
BP	GO:2000106	regulation of leukocyte apoptotic process	0.000241789	0.00387977	0.00209765	PRKCQ/BAX/CDKN2A	3
BP	GO:0006816	calcium ion transport	0.000242138	0.00387977	0.00209765	ITPR1/BCL2/BAX/CX3CL1/CCL2	5
BP	GO:0009791	post-embryonic development	0.000258572	0.00409602	0.00221457	ITPR1/BCL2/BAX	3
BP	GO:0042391	regulation of membrane potential	0.000273438	0.00423454	0.00228946	BCL2/BID/BAX/BCL2L1/GRID2	5
BP	GO:0000045	autophagosome assembly	0.000276092	0.00423454	0.00228946	TP53INP2/MAP1LC3C/ATG9B	3
BP	GO:0060249	anatomical structure homeostasis	0.00027643	0.00423454	0.00228946	PRKCQ/BCL2/BAX/CX3CL1/TP53INP2	5
BP	GO:0048608	reproductive structure development	0.000285554	0.0042534	0.00229966	BCL2/BAX/BCL2L1/CTSB/TP63	5
BP	GO:0030540	female genitalia development	0.000286815	0.0042534	0.00229966	BAX/TP63	2
BP	GO:2000269	regulation of fibroblast apoptotic process	0.000286815	0.0042534	0.00229966	BID/TP63	2
BP	GO:0061458	reproductive system development	0.000294906	0.00432736	0.00233964	BCL2/BAX/BCL2L1/CTSB/TP63	5
BP	GO:1905037	autophagosome organization	0.000303784	0.0044112	0.00238497	TP53INP2/MAP1LC3C/ATG9B	3
BP	GO:2001243	negative regulation of intrinsic apoptotic signaling pathway	0.000323207	0.0046257	0.00250094	BCL2/BID/BCL2L1	3
BP	GO:0051924	regulation of calcium ion transport	0.000325193	0.0046257	0.00250094	BCL2/BAX/CX3CL1/CCL2	4
BP	GO:0008585	female gonad development	0.000343414	0.00483554	0.0026144	BCL2/BAX/BCL2L1	3
BP	GO:0070584	mitochondrion morphogenesis	0.00035556	0.0049565	0.0026798	BAX/BCL2L1	2
BP	GO:0010522	regulation of calcium ion transport into cytosol	0.000364419	0.0050297	0.00271937	BCL2/BAX/CX3CL1	3
BP	GO:0030593	neutrophil chemotaxis	0.000375224	0.00512807	0.00277256	CX3CL1/DAPK2/CCL2	3
BP	GO:0036499	PERK-mediated unfolded protein response	0.000392647	0.00517801	0.00279956	PPP1R15A/CCL2	2
BP	GO:0043496	regulation of protein homodimerization activity	0.000392647	0.00517801	0.00279956	BCL2/BAX	2
BP	GO:0044346	fibroblast apoptotic process	0.000392647	0.00517801	0.00279956	BID/TP63	2
BP	GO:0070838	divalent metal ion transport	0.00039389	0.00517801	0.00279956	ITPR1/BCL2/BAX/CX3CL1/CCL2	5
BP	GO:0046545	development of primary female sexual characteristics	0.000397452	0.00517801	0.00279956	BCL2/BAX/BCL2L1	3
BP	GO:0072511	divalent inorganic cation transport	0.000405826	0.00522911	0.00282719	ITPR1/BCL2/BAX/CX3CL1/CCL2	5
BP	GO:2001237	negative regulation of extrinsic apoptotic signaling pathway	0.000408876	0.00522911	0.00282719	BCL2/BCL2L1/CX3CL1	3
BP	GO:0071887	leukocyte apoptotic process	0.000444413	0.00563192	0.00304497	PRKCQ/BAX/CDKN2A	3
BP	GO:1904019	epithelial cell apoptotic process	0.000456684	0.0057353	0.00310086	BID/BCL2L1/CCL2	3
BP	GO:0007548	sex differentiation	0.000501503	0.00624192	0.00337477	BCL2/BAX/BCL2L1/TP63	4
BP	GO:1990266	neutrophil migration	0.000507947	0.00626618	0.00338789	CX3CL1/DAPK2/CCL2	3
BP	GO:0007569	cell aging	0.000521315	0.00637467	0.00344655	BCL2/CDKN2A/TP63	3
BP	GO:2000134	negative regulation of G1/S transition of mitotic cell cycle	0.000534906	0.00648344	0.00350535	BCL2/BAX/CCL2	3
BP	GO:0031069	hair follicle morphogenesis	0.000558989	0.00648344	0.00350535	BCL2/TP63	2
BP	GO:0032461	positive regulation of protein oligomerization	0.000558989	0.00648344	0.00350535	BID/BAX	2
BP	GO:1900101	regulation of endoplasmic reticulum unfolded protein response	0.000558989	0.00648344	0.00350535	BAX/PPP1R15A	2
BP	GO:0030968	endoplasmic reticulum unfolded protein response	0.000562766	0.00648344	0.00350535	BAX/PPP1R15A/CCL2	3
BP	GO:0051209	release of sequestered calcium ion into cytosol	0.000562766	0.00648344	0.00350535	ITPR1/BAX/CX3CL1	3
BP	GO:0051928	positive regulation of calcium ion transport	0.000562766	0.00648344	0.00350535	BAX/CX3CL1/CCL2	3
BP	GO:0001952	regulation of cell-matrix adhesion	0.000577038	0.00659337	0.00356479	BCL2/CX3CL1/CDKN2A	3
BP	GO:0051283	negative regulation of sequestering of calcium ion	0.00059154	0.00670412	0.00362467	ITPR1/BAX/CX3CL1	3
BP	GO:0045930	negative regulation of mitotic cell cycle	0.000599282	0.00673709	0.00364249	BCL2/BAX/BCL2L1/CCL2	4
BP	GO:0070661	leukocyte proliferation	0.000615445	0.0067657	0.00365796	PRKCQ/BCL2/BAX/CX3CL1	4
BP	GO:0022612	gland morphogenesis	0.00062124	0.0067657	0.00365796	BCL2/BAX/TP63	3
BP	GO:0051282	regulation of sequestering of calcium ion	0.00062124	0.0067657	0.00365796	ITPR1/BAX/CX3CL1	3
BP	GO:0071621	granulocyte chemotaxis	0.00062124	0.0067657	0.00365796	CX3CL1/DAPK2/CCL2	3
BP	GO:1902807	negative regulation of cell cycle G1/S phase transition	0.000636442	0.00686567	0.00371201	BCL2/BAX/CCL2	3
BP	GO:0072001	renal system development	0.00064027	0.00686567	0.00371201	BCL2/BAX/ITGA3/ITGB4	4
BP	GO:0051208	sequestering of calcium ion	0.000667554	0.00710359	0.00384065	ITPR1/BAX/CX3CL1	3
BP	GO:0048730	epidermis morphogenesis	0.000702502	0.00736306	0.00398094	BCL2/TP63	2
BP	GO:2000108	positive regulation of leukocyte apoptotic process	0.000702502	0.00736306	0.00398094	BAX/CDKN2A	2
BP	GO:0042476	odontogenesis	0.00071602	0.00742455	0.00401418	BAX/ITGB4/TP63	3
BP	GO:0060326	cell chemotaxis	0.000719021	0.00742455	0.00401418	PRKCQ/CX3CL1/DAPK2/CCL2	4
BP	GO:0033032	regulation of myeloid cell apoptotic process	0.000753887	0.00767094	0.00414739	BCL2/CDKN2A	2
BP	GO:0090200	positive regulation of release of cytochrome c from mitochondria	0.000753887	0.00767094	0.00414739	BID/BAX	2
BP	GO:0007498	mesoderm development	0.000801689	0.0080358	0.00434466	ITGA3/ITGB4/TP63	3
BP	GO:0048565	digestive tract development	0.000801689	0.0080358	0.00434466	BCL2/ITGB4/TP63	3
BP	GO:0001782	B cell homeostasis	0.000807039	0.0080358	0.00434466	BCL2/BAX	2
BP	GO:0097553	calcium ion transmembrane import into cytosol	0.00081957	0.0081027	0.00438083	ITPR1/BAX/CX3CL1	3
BP	GO:0034620	cellular response to unfolded protein	0.000837703	0.00822364	0.00444622	BAX/PPP1R15A/CCL2	3
BP	GO:0007204	positive regulation of cytosolic calcium ion concentration	0.000854858	0.00828662	0.00448027	ITPR1/BCL2/BAX/CX3CL1	4
BP	GO:0097530	granulocyte migration	0.000856089	0.00828662	0.00448027	CX3CL1/DAPK2/CCL2	3
BP	GO:0048873	homeostasis of number of cells within a tissue	0.000861952	0.00828662	0.00448027	BCL2/BAX	2
BP	GO:0008584	male gonad development	0.000874731	0.00835189	0.00451556	BCL2/BAX/BCL2L1	3
BP	GO:0046546	development of primary male sexual characteristics	0.00089363	0.00847429	0.00458173	BCL2/BAX/BCL2L1	3
BP	GO:0090150	establishment of protein localization to membrane	0.000940155	0.00885525	0.0047877	BCL2/BID/BAX/TP63	4
BP	GO:1903829	positive regulation of cellular protein localization	0.000951224	0.00889938	0.00481156	BCL2/BID/ITGA3/TP63	4
BP	GO:0033028	myeloid cell apoptotic process	0.000977042	0.00907998	0.00490921	BCL2/CDKN2A	2
BP	GO:0055123	digestive system development	0.00103322	0.00945015	0.00510934	BCL2/ITGB4/TP63	3
BP	GO:0043276	anoikis	0.00103721	0.00945015	0.00510934	BCL2/DAPK2	2
BP	GO:0048333	mesodermal cell differentiation	0.00103721	0.00945015	0.00510934	ITGA3/ITGB4	2
BP	GO:0010212	response to ionizing radiation	0.00109704	0.00975909	0.00527638	BCL2/BAX/BCL2L1	3
BP	GO:0051092	positive regulation of NF-kappaB transcription factor activity	0.00109704	0.00975909	0.00527638	PRKCQ/CX3CL1/SPHK1	3
BP	GO:0048246	macrophage chemotaxis	0.00109912	0.00975909	0.00527638	CX3CL1/CCL2	2
BP	GO:1905898	positive regulation of response to endoplasmic reticulum stress	0.00109912	0.00975909	0.00527638	BAX/PPP1R15A	2
BP	GO:0001764	neuron migration	0.0011633	0.0102635	0.00554911	BAX/ITGA3/CX3CL1	3
BP	GO:0035967	cellular response to topologically incorrect protein	0.00120885	0.0105983	0.00573013	BAX/PPP1R15A/CCL2	3
BP	GO:1900117	regulation of execution phase of apoptosis	0.00129527	0.011285	0.00610139	BAX/BCL2L1	2
BP	GO:0007033	vacuole organization	0.00135222	0.0115949	0.00626892	TP53INP2/MAP1LC3C/ATG9B	3
BP	GO:0046661	male sex differentiation	0.00135222	0.0115949	0.00626892	BCL2/BAX/BCL2L1	3
BP	GO:0051480	regulation of cytosolic calcium ion concentration	0.00135629	0.0115949	0.00626892	ITPR1/BCL2/BAX/CX3CL1	4
BP	GO:0043029	T cell homeostasis	0.0013641	0.0115949	0.00626892	BCL2/BAX	2
BP	GO:0051281	positive regulation of release of sequestered calcium ion into cytosol	0.00143466	0.0121207	0.00655321	BAX/CX3CL1	2
BP	GO:0002931	response to ischemia	0.00150693	0.0126546	0.00684186	BCL2/CX3CL1	2
BP	GO:0032459	regulation of protein oligomerization	0.00158091	0.0131178	0.0070923	BID/BAX	2
BP	GO:0042551	neuron maturation	0.00158091	0.0131178	0.0070923	BCL2/CX3CL1	2
BP	GO:0042771	intrinsic apoptotic signaling pathway in response to DNA damage by p53 class mediator	0.0016566	0.0136645	0.00738788	BCL2/TP63	2
BP	GO:0048066	developmental pigmentation	0.00173399	0.0142187	0.00768751	BCL2/BAX	2
BP	GO:1901990	regulation of mitotic cell cycle phase transition	0.00174724	0.0142436	0.007701	BCL2/BID/BAX/CCL2	4
BP	GO:0010959	regulation of metal ion transport	0.00176435	0.0142994	0.00773117	BCL2/BAX/CX3CL1/CCL2	4
BP	GO:1900034	regulation of cellular response to heat	0.00181307	0.0146094	0.00789874	DNAJB1/HSPB8	2
BP	GO:0048736	appendage development	0.00184525	0.0146987	0.00794705	BAX/ITGB4/TP63	3
BP	GO:0060173	limb development	0.00184525	0.0146987	0.00794705	BAX/ITGB4/TP63	3
BP	GO:0006984	ER-nucleus signaling pathway	0.00189385	0.0148316	0.00801889	PPP1R15A/CCL2	2
BP	GO:0048806	genitalia development	0.00189385	0.0148316	0.00801889	BAX/TP63	2
BP	GO:1905517	macrophage migration	0.00189385	0.0148316	0.00801889	CX3CL1/CCL2	2
BP	GO:0048546	digestive tract morphogenesis	0.00214629	0.0166594	0.00900712	BCL2/TP63	2
BP	GO:0045785	positive regulation of cell adhesion	0.00215114	0.0166594	0.00900712	PRKCQ/ITGA3/CX3CL1/CCL2	4
BP	GO:0070231	T cell apoptotic process	0.00223379	0.0172039	0.00930149	PRKCQ/BAX	2
BP	GO:1901991	negative regulation of mitotic cell cycle phase transition	0.00236706	0.0181301	0.00980227	BCL2/BAX/CCL2	3
BP	GO:0043588	skin development	0.00246108	0.0186454	0.0100809	BCL2/ITGA3/ITGB4/TP63	4
BP	GO:1901987	regulation of cell cycle phase transition	0.00246108	0.0186454	0.0100809	BCL2/BID/BAX/CCL2	4
BP	GO:0001558	regulation of cell growth	0.00254868	0.0192046	0.0103832	PRKCQ/BCL2/CDKN2A/SPHK1	4
BP	GO:0052548	regulation of endopeptidase activity	0.00257091	0.019268	0.0104175	BID/BAX/SERPINA1/TP63	4
BP	GO:0010524	positive regulation of calcium ion transport into cytosol	0.00260044	0.019282	0.010425	BAX/CX3CL1	2
BP	GO:0045123	cellular extravasation	0.00260044	0.019282	0.010425	CX3CL1/CCL2	2
BP	GO:0097529	myeloid leukocyte migration	0.00265898	0.0196117	0.0106033	CX3CL1/DAPK2/CCL2	3
BP	GO:0031663	lipopolysaccharide-mediated signaling pathway	0.00279369	0.0204969	0.0110819	CX3CL1/CCL2	2
BP	GO:0070228	regulation of lymphocyte apoptotic process	0.00289278	0.0211128	0.0114149	PRKCQ/BAX	2
BP	GO:2001020	regulation of response to DNA damage stimulus	0.00293195	0.0212871	0.0115092	BCL2/BID/BCL2L1	3
BP	GO:0009266	response to temperature stimulus	0.00301299	0.0217623	0.011766	DNAJB1/FOS/HSPB8	3
BP	GO:0043281	regulation of cysteine-type endopeptidase activity involved in apoptotic process	0.00305403	0.021945	0.0118648	BID/BAX/TP63	3
BP	GO:1901988	negative regulation of cell cycle phase transition	0.00313715	0.0224266	0.0121252	BCL2/BAX/CCL2	3
BP	GO:0052547	regulation of peptidase activity	0.0031713	0.0225284	0.0121803	BID/BAX/SERPINA1/TP63	4
BP	GO:0009314	response to radiation	0.00319714	0.0225284	0.0121803	BCL2/BAX/BCL2L1/FOS	4
BP	GO:0060135	maternal process involved in female pregnancy	0.00319987	0.0225284	0.0121803	ITGA3/CTSB	2
BP	GO:0002768	immune response-regulating cell surface receptor signaling pathway	0.00324927	0.0227612	0.0123061	PRKCQ/BCL2/BAX/FOS	4
BP	GO:0006874	cellular calcium ion homeostasis	0.00332855	0.0232	0.0125434	ITPR1/BCL2/BAX/CX3CL1	4
BP	GO:0008406	gonad development	0.003351	0.0232403	0.0125652	BCL2/BAX/BCL2L1	3
BP	GO:0030595	leukocyte chemotaxis	0.00339483	0.0234106	0.0126572	CX3CL1/DAPK2/CCL2	3
BP	GO:0042110	T cell activation	0.00340915	0.0234106	0.0126572	PRKCQ/BCL2/BAX/CCL2	4
BP	GO:0072331	signal transduction by p53 class mediator	0.003439	0.0234998	0.0127055	BCL2/BAX/TP63	3
BP	GO:0048247	lymphocyte chemotaxis	0.00352159	0.0239468	0.0129471	CX3CL1/CCL2	2
BP	GO:0001894	tissue homeostasis	0.00357364	0.0241099	0.0130353	BCL2/BAX/TP53INP2	3
BP	GO:0045137	development of primary sexual characteristics	0.00361923	0.0241099	0.0130353	BCL2/BAX/BCL2L1	3
BP	GO:0002260	lymphocyte homeostasis	0.00363205	0.0241099	0.0130353	BCL2/BAX	2
BP	GO:0002548	monocyte chemotaxis	0.00363205	0.0241099	0.0130353	CX3CL1/CCL2	2
BP	GO:0032651	regulation of interleukin-1 beta production	0.00363205	0.0241099	0.0130353	CX3CL1/SPHK1	2
BP	GO:0055074	calcium ion homeostasis	0.00368748	0.0243618	0.0131715	ITPR1/BCL2/BAX/CX3CL1	4
BP	GO:0010812	negative regulation of cell-substrate adhesion	0.00385781	0.0253669	0.0137149	CX3CL1/CDKN2A	2
BP	GO:0048871	multicellular organismal homeostasis	0.00398098	0.0260539	0.0140864	BCL2/BAX/TP53INP2/TP63	4
BP	GO:2000116	regulation of cysteine-type endopeptidase activity	0.00409489	0.0266742	0.0144217	BID/BAX/TP63	3
BP	GO:0050900	leukocyte migration	0.00419566	0.0272035	0.0147079	ITGA3/CX3CL1/DAPK2/CCL2	4
BP	GO:0071356	cellular response to tumor necrosis factor	0.00424467	0.0273938	0.0148108	CX3CL1/SPHK1/CCL2	3
BP	GO:0048678	response to axon injury	0.00432846	0.0276783	0.0149646	BCL2/BAX	2
BP	GO:1904427	positive regulation of calcium ion transmembrane transport	0.00432846	0.0276783	0.0149646	BAX/CX3CL1	2
BP	GO:0072503	cellular divalent inorganic cation homeostasis	0.00435376	0.027713	0.0149834	ITPR1/BCL2/BAX/CX3CL1	4
BP	GO:0016049	cell growth	0.00441812	0.0279948	0.0151357	PRKCQ/BCL2/CDKN2A/SPHK1	4
BP	GO:0007050	cell cycle arrest	0.00455418	0.0285882	0.0154566	BAX/CDKN2A/PPP1R15A	3
BP	GO:0001707	mesoderm formation	0.00457329	0.0285882	0.0154566	ITGA3/ITGB4	2
BP	GO:0070227	lymphocyte apoptotic process	0.00457329	0.0285882	0.0154566	PRKCQ/BAX	2
BP	GO:0050878	regulation of body fluid levels	0.00468202	0.0291071	0.0157371	PRKCQ/ITPR1/SERPINA1/TP63	4
BP	GO:0032611	interleukin-1 beta production	0.00469806	0.0291071	0.0157371	CX3CL1/SPHK1	2
BP	GO:0000422	autophagy of mitochondrion	0.00482441	0.0294966	0.0159477	MAP1LC3C/ATG9B	2
BP	GO:0048332	mesoderm morphogenesis	0.00482441	0.0294966	0.0159477	ITGA3/ITGB4	2
BP	GO:0061726	mitochondrion disassembly	0.00482441	0.0294966	0.0159477	MAP1LC3C/ATG9B	2
BP	GO:0022409	positive regulation of cell-cell adhesion	0.00509994	0.0310451	0.0167849	PRKCQ/CX3CL1/CCL2	3
BP	GO:0032652	regulation of interleukin-1 production	0.00521281	0.0315941	0.0170818	CX3CL1/SPHK1	2
BP	GO:0007281	germ cell development	0.00532886	0.0319805	0.0172907	BCL2/BAX/BCL2L1	3
BP	GO:0051091	positive regulation of DNA-binding transcription factor activity	0.00532886	0.0319805	0.0172907	PRKCQ/CX3CL1/SPHK1	3
BP	GO:1905897	regulation of response to endoplasmic reticulum stress	0.00534538	0.0319805	0.0172907	BAX/PPP1R15A	2
BP	GO:0034612	response to tumor necrosis factor	0.00544561	0.0324409	0.0175396	CX3CL1/SPHK1/CCL2	3
BP	GO:0031668	cellular response to extracellular stimulus	0.00550457	0.0326526	0.0176541	BCL2/MAP1LC3C/FOS	3
BP	GO:0050851	antigen receptor-mediated signaling pathway	0.00556391	0.0328648	0.0177688	PRKCQ/BCL2/BAX	3
BP	GO:0051279	regulation of release of sequestered calcium ion into cytosol	0.00561516	0.0329384	0.0178086	BAX/CX3CL1	2
BP	GO:0043270	positive regulation of ion transport	0.00562363	0.0329384	0.0178086	BAX/CX3CL1/CCL2	3
BP	GO:1901216	positive regulation of neuron death	0.00575237	0.0335515	0.01814	BAX/FOS	2
BP	GO:0046651	lymphocyte proliferation	0.00586642	0.0340741	0.0184226	PRKCQ/BCL2/BAX	3
BP	GO:0097194	execution phase of apoptosis	0.0058911	0.0340755	0.0184234	BAX/BCL2L1	2
BP	GO:0032943	mononuclear cell proliferation	0.00599014	0.0345052	0.0186557	PRKCQ/BCL2/BAX	3
BP	GO:0001822	kidney development	0.00630632	0.0360867	0.0195107	BCL2/BAX/ITGA3	3
BP	GO:0071674	mononuclear cell migration	0.00631647	0.0360867	0.0195107	CX3CL1/CCL2	2
BP	GO:0000079	regulation of cyclin-dependent protein serine/threonine kinase activity	0.00660764	0.0371413	0.0200809	CDKN2A/DIRAS3	2
BP	GO:0001942	hair follicle development	0.00660764	0.0371413	0.0200809	BCL2/TP63	2
BP	GO:0032612	interleukin-1 production	0.00660764	0.0371413	0.0200809	CX3CL1/SPHK1	2
BP	GO:0070098	chemokine-mediated signaling pathway	0.00660764	0.0371413	0.0200809	CX3CL1/CCL2	2
BP	GO:0001776	leukocyte homeostasis	0.00675549	0.0376686	0.020366	BCL2/BAX	2
BP	GO:0006919	activation of cysteine-type endopeptidase activity involved in apoptotic process	0.00675549	0.0376686	0.020366	BID/BAX	2
BP	GO:0016236	macroautophagy	0.00683276	0.0378951	0.0204885	TP53INP2/MAP1LC3C/ATG9B	3
BP	GO:0022404	molting cycle process	0.00690484	0.0378951	0.0204885	BCL2/TP63	2
BP	GO:0022405	hair cycle process	0.00690484	0.0378951	0.0204885	BCL2/TP63	2
BP	GO:0098773	skin epidermis development	0.00690484	0.0378951	0.0204885	BCL2/TP63	2
BP	GO:0018105	peptidyl-serine phosphorylation	0.00703675	0.038271	0.0206917	PRKCQ/BCL2/BAX	3
BP	GO:0007215	glutamate receptor signaling pathway	0.0070557	0.038271	0.0206917	CX3CL1/GRID2	2
BP	GO:0048145	regulation of fibroblast proliferation	0.0070557	0.038271	0.0206917	BAX/SPHK1	2
BP	GO:0042100	B cell proliferation	0.00720805	0.0386462	0.0208946	BCL2/BAX	2
BP	GO:0048144	fibroblast proliferation	0.00720805	0.0386462	0.0208946	BAX/SPHK1	2
BP	GO:1904029	regulation of cyclin-dependent protein kinase activity	0.00720805	0.0386462	0.0208946	CDKN2A/DIRAS3	2
BP	GO:1903076	regulation of protein localization to plasma membrane	0.00751722	0.0400473	0.0216521	BCL2L1/ITGA3	2
BP	GO:0019058	viral life cycle	0.00752682	0.0400473	0.0216521	BCL2/CTSB/CCL2	3
BP	GO:0007044	cell-substrate junction assembly	0.00783233	0.0410461	0.0221921	BCL2/ITGB4	2
BP	GO:0043473	pigmentation	0.00783233	0.0410461	0.0221921	BCL2/BAX	2
BP	GO:1990868	response to chemokine	0.00783233	0.0410461	0.0221921	CX3CL1/CCL2	2
BP	GO:1990869	cellular response to chemokine	0.00783233	0.0410461	0.0221921	CX3CL1/CCL2	2
BP	GO:1903008	organelle disassembly	0.00815333	0.0425683	0.0230151	MAP1LC3C/ATG9B	2
BP	GO:0018209	peptidyl-serine modification	0.00841328	0.0437616	0.0236603	PRKCQ/BCL2/BAX	3
BP	GO:0007229	integrin-mediated signaling pathway	0.00848021	0.0438326	0.0236987	ITGA3/ITGB4	2
BP	GO:0070588	calcium ion transmembrane transport	0.00848982	0.0438326	0.0236987	ITPR1/BAX/CX3CL1	3
BP	GO:0010948	negative regulation of cell cycle process	0.00864414	0.0444647	0.0240404	BCL2/BAX/CCL2	3
BP	GO:0009416	response to light stimulus	0.00895775	0.0459085	0.024821	BCL2/BAX/FOS	3
BP	GO:0034605	cellular response to heat	0.00932286	0.0476046	0.0257381	DNAJB1/HSPB8	2
BP	GO:0022037	metencephalon development	0.00949572	0.0481347	0.0260246	BCL2/GRID2	2
BP	GO:0072676	lymphocyte migration	0.00949572	0.0481347	0.0260246	CX3CL1/CCL2	2
BP	GO:0051235	maintenance of location	0.00977094	0.0493503	0.0266819	ITPR1/BAX/CX3CL1	3
CC	GO:0005741	mitochondrial outer membrane	3.42557e-06	0.00020184	0.000146286	BCL2/BID/BAX/BCL2L1/PPP1R15A	5
CC	GO:0005776	autophagosome	5.43678e-06	0.00020184	0.000146286	TP53INP2/MAP1LC3C/DAPK2/ATG9B	4
CC	GO:0031968	organelle outer membrane	6.31087e-06	0.00020184	0.000146286	BCL2/BID/BAX/BCL2L1/PPP1R15A	5
CC	GO:0019867	outer membrane	6.61771e-06	0.00020184	0.000146286	BCL2/BID/BAX/BCL2L1/PPP1R15A	5
CC	GO:0046930	pore complex	0.000254009	0.00619781	0.00449194	BCL2/BAX	2
CC	GO:0000421	autophagosome membrane	0.000814132	0.0141892	0.0102838	MAP1LC3C/ATG9B	2
CC	GO:0008305	integrin complex	0.000814132	0.0141892	0.0102838	ITGA3/ITGB4	2
CC	GO:0098636	protein complex involved in cell adhesion	0.000974252	0.0148573	0.010768	ITGA3/ITGB4	2
CC	GO:0098802	plasma membrane receptor complex	0.00178978	0.0185805	0.0134664	ITGA3/ITGB4/GRID2	3
CC	GO:0008287	protein serine/threonine phosphatase complex	0.00182759	0.0185805	0.0134664	ITPR1/PPP1R15A	2
CC	GO:0060076	excitatory synapse	0.00182759	0.0185805	0.0134664	ITGA3/GRID2	2
CC	GO:1903293	phosphatase complex	0.00182759	0.0185805	0.0134664	ITPR1/PPP1R15A	2
CC	GO:0005635	nuclear envelope	0.00296302	0.0278068	0.0201533	ITPR1/BCL2/BAX/BCL2L1	4
MF	GO:0051400	BH domain binding	3.00181e-07	1.93617e-05	1.18492e-05	BCL2/BAX/BCL2L1	3
MF	GO:0070513	death domain binding	3.00181e-07	1.93617e-05	1.18492e-05	BCL2/BAX/BCL2L1	3
MF	GO:0002020	protease binding	0.000713796	0.018375	0.0112454	BCL2/ITGA3/SERPINA1	3
MF	GO:0005178	integrin binding	0.000730523	0.018375	0.0112454	ITGA3/CX3CL1/ITGB4	3
MF	GO:0051721	protein phosphatase 2A binding	0.000765429	0.018375	0.0112454	BCL2/SPHK1	2
MF	GO:0019903	protein phosphatase binding	0.00085465	0.018375	0.0112454	BCL2/SPHK1/PPP1R15A	3
MF	GO:0016248	channel inhibitor activity	0.00131504	0.0212051	0.0129774	ITPR1/BCL2	2
MF	GO:0030544	Hsp70 protein binding	0.00131504	0.0212051	0.0129774	BAX/DNAJB1	2
MF	GO:0048020	CCR chemokine receptor binding	0.00168185	0.0241066	0.0147531	CX3CL1/CCL2	2
MF	GO:0019902	phosphatase binding	0.00197583	0.0254882	0.0155987	BCL2/SPHK1/PPP1R15A	3
MF	GO:0008009	chemokine activity	0.00217895	0.0255531	0.0156384	CX3CL1/CCL2	2
MF	GO:0042379	chemokine receptor binding	0.00391622	0.0346857	0.0212275	CX3CL1/CCL2	2
MF	GO:0015267	channel activity	0.00395132	0.0346857	0.0212275	ITPR1/BCL2/BAX/GRID2	4
MF	GO:0022803	passive transmembrane transporter activity	0.00398158	0.0346857	0.0212275	ITPR1/BCL2/BAX/GRID2	4
MF	GO:0005518	collagen binding	0.00403322	0.0346857	0.0212275	ITGA3/CTSB	2
MF	GO:0050839	cell adhesion molecule binding	0.00455361	0.0367135	0.0224685	ITGA3/CX3CL1/ITGB4/DNAJB1	4

## Sheet: KEGG analysis
ID	Description	pvalue	p.adjust	qvalue	geneID	Count
hsa01524	Platinum drug resistance	2.11862e-07	8.47449e-07	2.23013e-07	BCL2/BID/BAX/BCL2L1/CDKN2A	5
hsa01522	Endocrine resistance	4.55899e-05	9.11798e-05	2.39947e-05	BCL2/BAX/CDKN2A/FOS	4
hsa01521	EGFR tyrosine kinase inhibitor resistance	0.000697532	0.000930043	0.000244748	BCL2/BAX/BCL2L1	3
